# Supplementary material
Source: publisher site journal article supplement (http://kjim.org/upload/media/kjim-2019-006-suppl3.pdf)
Supplement: Supplementary file 1 [file kjim-2019-006-suppl3.pdf]

**Supplementary Table 3. Association of body composition with the pain visual analogue scale**

| Covariate and tertiles/groups  | Unadjusted analyses |         | Adjusted analyses |         |
|--------------------------------|---------------------|---------|-------------------|---------|
|                                | OR (95% CI)         | p value | OR (95% CI)       | p value |
| Sex                            | 1.05 (0.57–1.93)    | 0.880   | NA                |         |
| Age                            | 1.02 (1–1.04)       | 0.040   | 1 (0.98–1.02)     | 0.970   |
| Disease duration, yr           | 1.02 (0.98–1.06)    | 0.340   | NA                |         |
| Anti-CCP positivity            | 0.65 (0.41–1.06)    | 0.080   | NA                |         |
| Current steroid dose           | 0.97 (0.9–1.05)     | 0.460   | NA                |         |
| DAS28                          | 2.69 (2.13–3.41)    | < 0.001 | 2.32 (1.79–3.02)  | < 0.001 |
| BMI                            | 1.09 (1.02–1.15)    | 0.010   | 1.03 (0.96–1.09)  | 0.410   |
| Skeletal muscle mass           | 1 (0.95–1.06)       | 0.910   | NA                |         |
| Body fat mass                  | 1.03 (1–1.06)       | 0.100   | NA                |         |
| Body fat/skeletal muscle ratio | 2.37 (1.28–4.37)    | 0.010   | 2.79 (1.39–5.6)   | 0.004   |
| HAQ                            | 4.84 (2.98–7.88)    | < 0.001 | 2.21 (1.26–3.86)  | 0.010   |

OR, odds ratio; CI, confidence interval; NA, not applicable; CCP, citrullinated protein antibody; DAS28, disease activity score in 28 joints; BMI, body mass index; HAQ, health assessment questionnaire.
